# Supplementary material for: Overcharging Effect in Electrospray Ionization Mass Spectra of Daunomycin-Tuftsin Bioconjugates
Source: PubMed Central journal article supplement (PMC6720970; doi:10.3390/molecules24162981), 2019-08-16
Supplement: molecules-24-02981-s001.pdf [file molecules-24-02981-s001.pdf]

# Supplementary Materials

## Overcharging effect in electrospray ionization mass spectra of daunomycin-tuftsins bioconjugates

Lilla Pethő<sup>1</sup>, Gábor Mező<sup>1,2</sup> and Gitta Schlosser<sup>1,3,\*</sup>

<sup>1</sup> MTA-ELTE Research Group of Peptide Chemistry, Hungarian Academy of Sciences, Eötvös Loránd University, Pázmány Péter sétány 1/A, 1117 Budapest, Hungary

<sup>2</sup> ELTE Eötvös Loránd University, Faculty of Science, Institute of Chemistry, Department of Organic Chemistry, Pázmány Péter sétány 1/A, 1117 Budapest, Hungary

<sup>3</sup> ELTE Eötvös Loránd University, Faculty of Science, Institute of Chemistry, Department of Analytical Chemistry, Pázmány Péter sétány 1/A, 1117 Budapest, Hungary

\* Correspondence: schlosser@caesar.elte.hu

### TABLE OF CONTENT

|                                                                                     |    |
|-------------------------------------------------------------------------------------|----|
| <b>Analytical data</b> .....                                                        | S2 |
| <b>Summarized analytical data of the daunomycin-tuftsins bioconjugates</b> .....    | S2 |
| <b>Mass spectra and analytical RP-HPLC chromatograms of the bioconjugates</b> ..... | S3 |

## Analytical data

### Summarized analytical data of the daunomycin-tuftsin bioconjugates

Table S1. Characteristics of daunomycin-tuftsin conjugates

| Number | Conjugates                              | $R_t$ (min) <sup>a</sup> | $MW_{calc.} / MW_{meas.}$ <sup>b</sup> |
|--------|-----------------------------------------|--------------------------|----------------------------------------|
| 1      | H-TK(Dau=Aoa)PR-OH                      | 19.8                     | 1082.5/1082.4                          |
| 2      | For-TK(Dau=Aoa)PR-OH                    | 20.4                     | 1110.5/1110.4                          |
| 3      | H-TK(Dau=Aoa-GFLG)PR-OH                 | 21.8                     | 1456.7/1456.7                          |
| 4      | H-[TK(Dau=Aoa)PR] <sub>2</sub> -OH      | 19.1                     | 2147.0/2147.1                          |
| 5      | For-[TK(Dau=Aoa)PR] <sub>2</sub> -OH    | 19.5                     | 2175.0/2175.1                          |
| 6      | H-[TK(Dau=Aoa-GFLG)PR] <sub>2</sub> -OH | 22.2                     | 2895.4/2895.3                          |

<sup>a</sup> Knauer RP-HPLC; Nucleosil C18 column (5  $\mu$ m, 100 Å; 250×4.6 mm) gradient: 0 min 2% B, 5 min 2% B, 30 min 90% B; eluents: 0.1% TFA in water (A) and 0.1% TFA in acetonitrile-water 80:20%, v/v (B); flow rate: 1 mL/min, detection:  $\lambda$  = 220 nm.

<sup>b</sup> Bruker Daltonics Esquire 3000+ ESI-MS, 10  $\mu$ L/min flow rate, positive ion mode in the  $m/z$  50–2000 range.

## Mass spectra and analytical RP-HPLC chromatograms of the bioconjugates

### H-TK(Dau=Aoa)PR-OH (1)

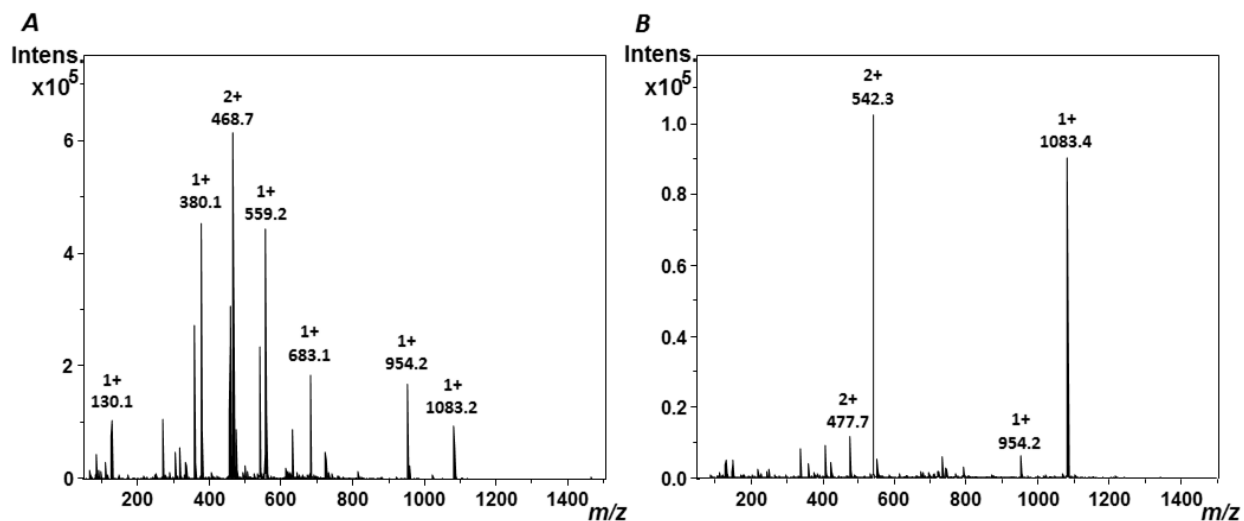

Figure S1. ESI-MS spectra of **1** under the commonly used ESI-MS conditions (acetonitrile-water (50:50%, v/v), 0.1% acetic acid; cap. exit: 136V; A) and under the optimized conditions ( $\text{NH}_4\text{OAc}$  buffer (50 mM, pH = 6.7) and acetonitrile (50:50%, v/v); cap. exit: 5V; B)

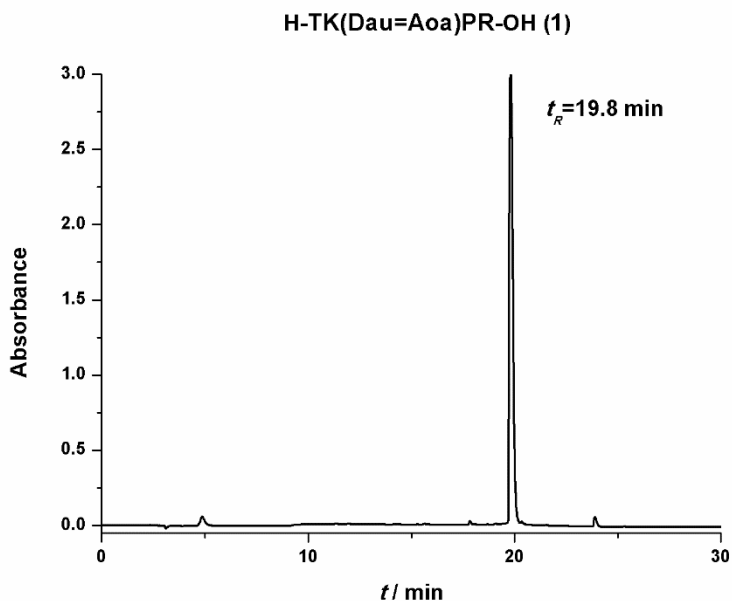

Figure S2. Analytical chromatogram of **1**

(Knauer RP-HPLC; Nucleosil C18 column (5  $\mu\text{m}$ , 100  $\text{\AA}$ ; 250 $\times$ 4.6 mm) gradient: 0 min 2% B, 5 min 2% B, 30 min 90% B; eluents: 0.1% TFA in water (A) and 0.1% TFA in acetonitrile-water 80:20%, v/v (B); flow rate: 1 mL/min, detection:  $\lambda = 220 \text{ nm}$ )

For-TK(Dau=Aoa)PR-OH (2)

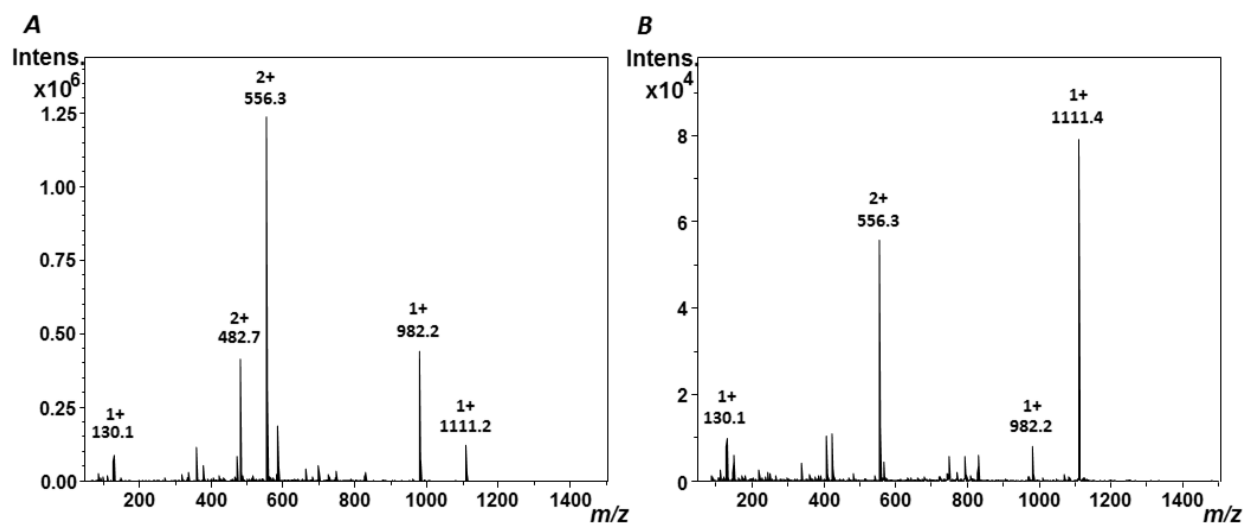

Figure S3. ESI-MS spectra of **2** under the commonly used ESI-MS conditions (acetonitrile-water (50:50%, v/v), 0.1% acetic acid; cap. exit: 136V; A) and under the optimized conditions (NH<sub>4</sub>OAc buffer (50 mM, pH = 6.7) and acetonitrile (50:50%, v/v); cap. exit: 5V; B)

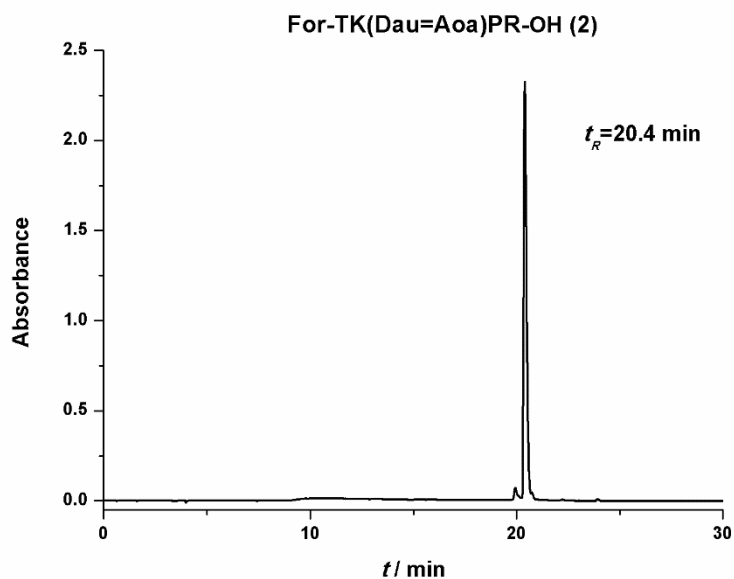

Figure S4. Analytical chromatogram of **2** (Knauer RP-HPLC; Nucleosil C18 column (5  $\mu$ m, 100  $\text{\AA}$ ; 250 $\times$ 4.6 mm) gradient: 0 min 2% B, 5 min 2% B, 30 min 90% B; eluents: 0.1% TFA in water (A) and 0.1% TFA in acetonitrile-water 80:20%, v/v (B); flow rate: 1 mL/min, detection:  $\lambda = 220$  nm)

### H-TK(Dau=Aoa-GFLG)PR-OH (**3**)

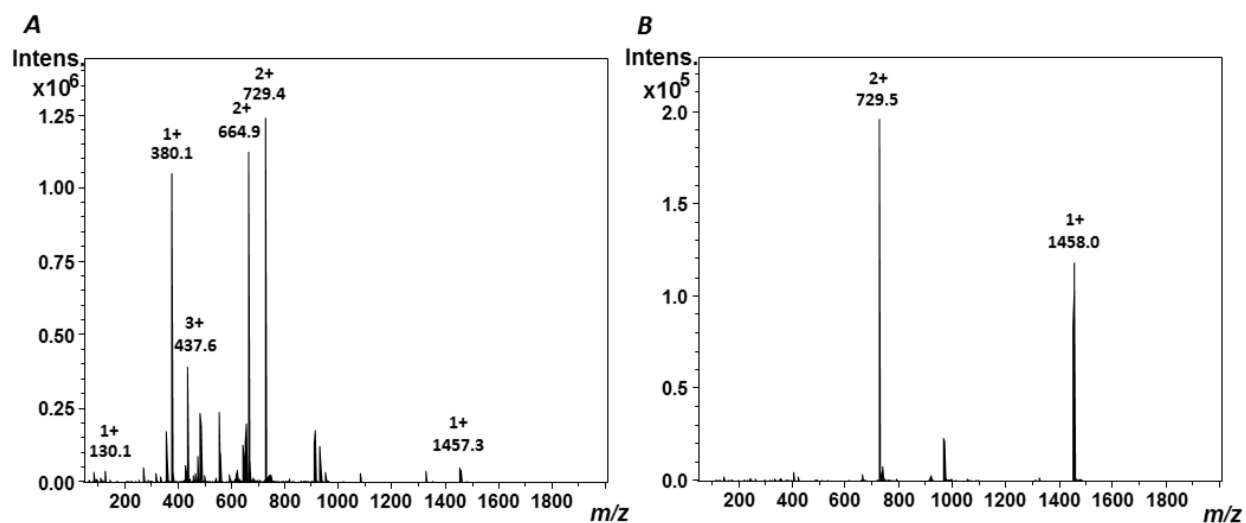

Figure S5. ESI-MS spectra of **3** under the commonly used ESI-MS conditions (acetonitrile-water (50:50%, v/v), 0.1% acetic acid; cap. exit: 143V; A) and under the optimized conditions ( $\text{NH}_4\text{OAc}$  buffer (50 mM, pH = 6.7) and acetonitrile (50:50%, v/v); cap. exit: 5V; B)

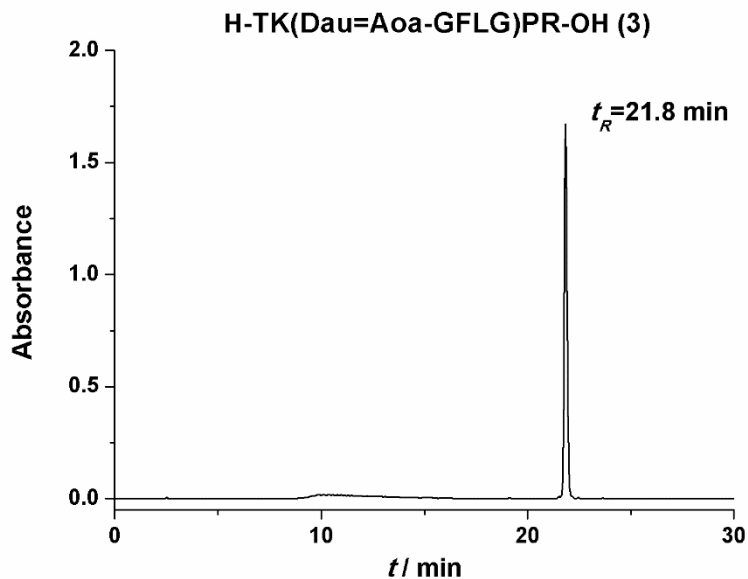

Figure S6. Analytical chromatogram of **3** (Knauer RP-HPLC; Nucleosil C18 column (5  $\mu\text{m}$ , 100  $\text{\AA}$ ; 250 $\times$ 4.6 mm) gradient: 0 min 2% B, 5 min 2% B, 30 min 90% B; eluents: 0.1% TFA in water (A) and 0.1% TFA in acetonitrile-water 80:20%, v/v (B); flow rate: 1 mL/min, detection:  $\lambda = 220$  nm)

H-TK(Dau=Aoa-GFLG)PR-OH sugar-lost (3)

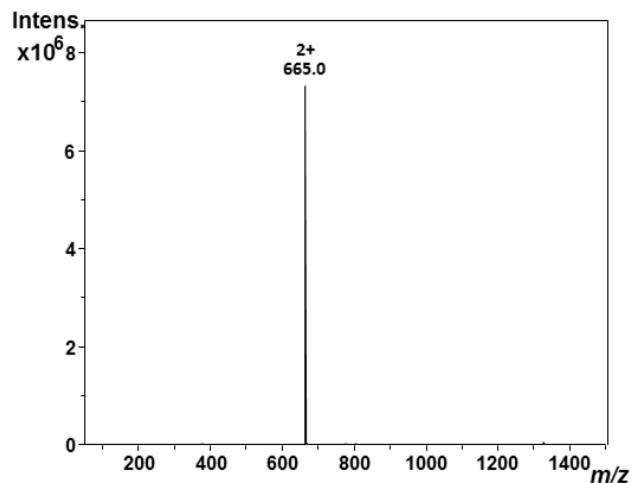

Figure S7. ESI-MS spectrum of sugar-lost, purified **3** under the commonly used ESI-MS conditions (acetonitrile-water (50:50%, v/v), 0.1% acetic acid; cap. exit: 143V)

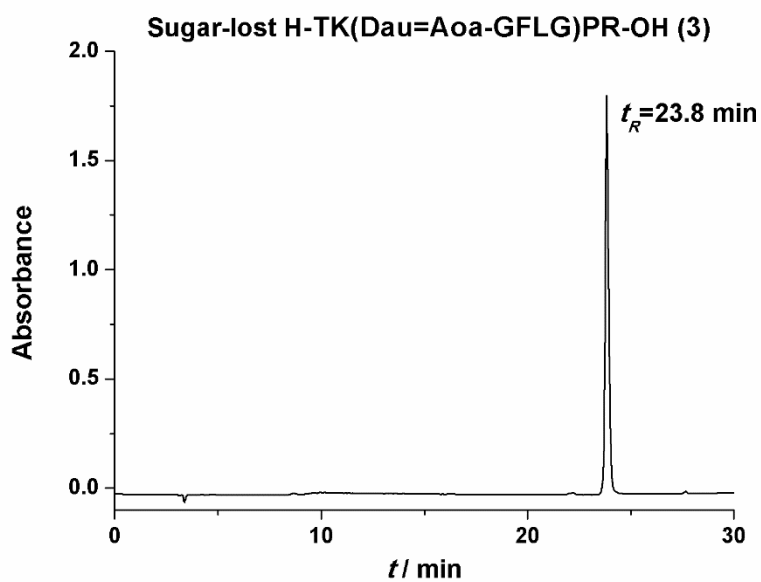

Figure S8. Analytical chromatogram of sugar-lost **3** (Knauer RP-HPLC; Nucleosil C18 column (5  $\mu$ m, 100  $\text{\AA}$ ; 250 $\times$ 4.6 mm) gradient: 0 min 2% B, 5 min 2% B, 30 min 90% B; eluents: 0.1% TFA in water (A) and 0.1% TFA in acetonitrile-water 80:20%, v/v (B); flow rate: 1 mL/min, detection:  $\lambda = 220$  nm)

H-[TK(Dau=Aoa)PR]<sub>2</sub>-OH (4)

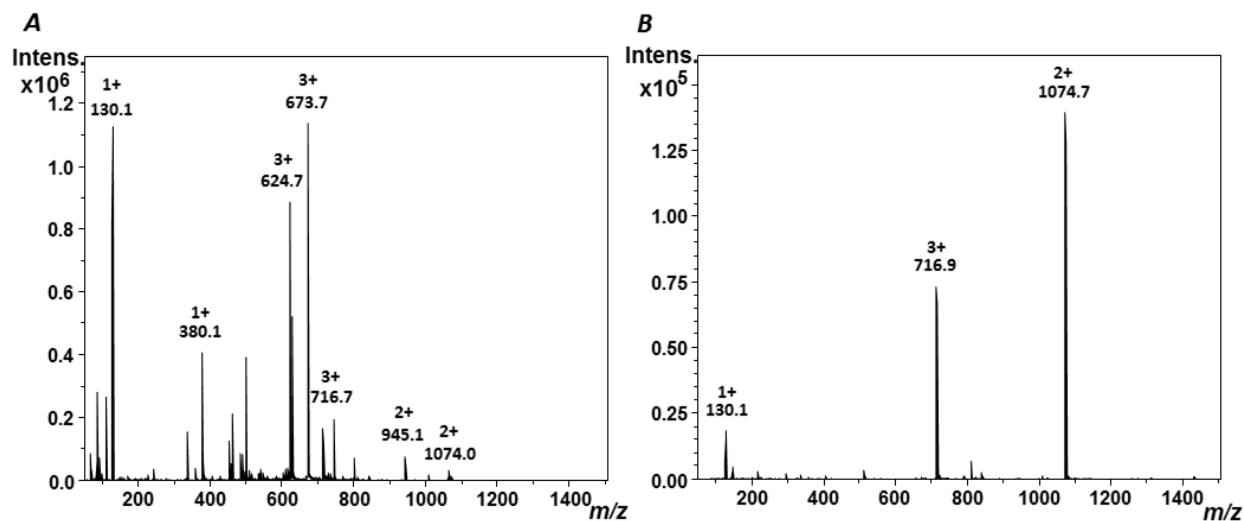

Figure S9. ESI-MS spectra of **4** under the commonly used ESI-MS conditions (acetonitrile-water (50:50%, v/v), 0.1% acetic acid; cap. exit: 143V; A) and under the optimized conditions (NH<sub>4</sub>OAc buffer (50 mM, pH = 6.7) and acetonitrile (50:50%, v/v); cap. exit: 5V; B)

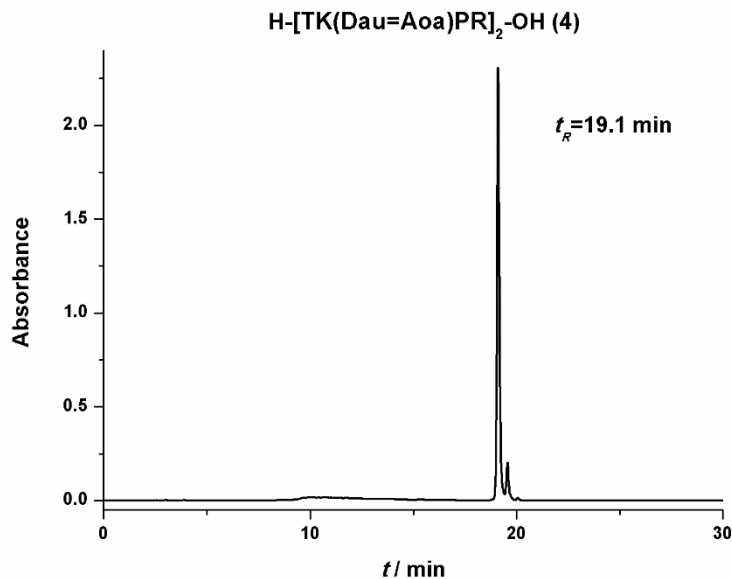

Figure S10. Analytical chromatogram of **4** (Knauer RP-HPLC; Nucleosil C18 column (5 μm, 100 Å; 250×4.6 mm) gradient: 0 min 2% B, 5 min 2% B, 30 min 90% B; eluents: 0.1% TFA in water (A) and 0.1% TFA in acetonitrile-water 80:20%, v/v (B); flow rate: 1 mL/min, detection: λ = 220 nm)

For-[TK(Dau=Aoa)PR]<sub>2</sub>-OH (**5**)

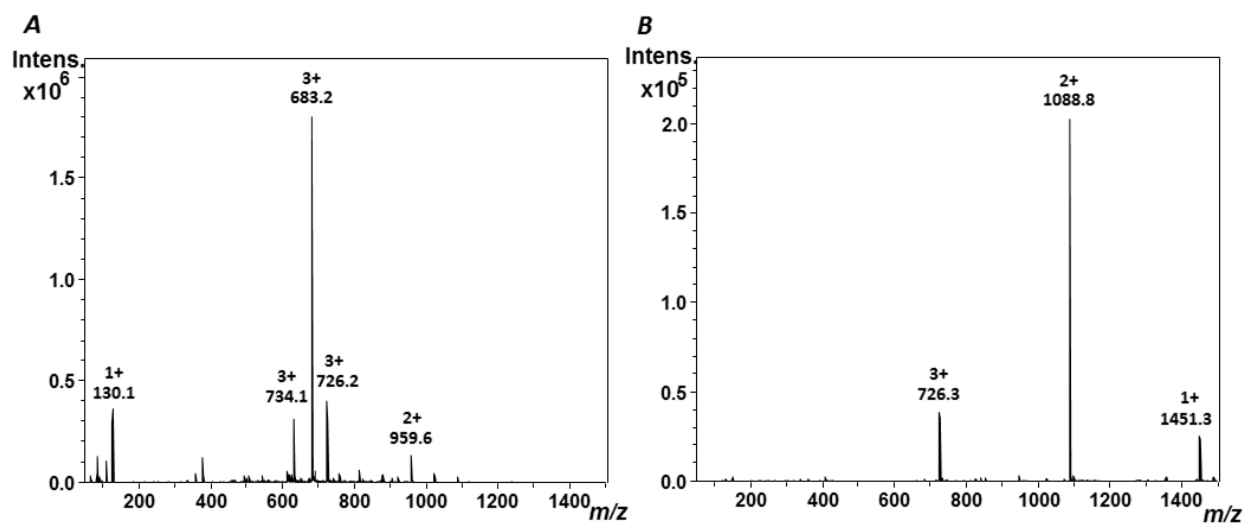

Figure S11. ESI-MS spectra of **5** under the commonly used ESI-MS conditions (acetonitrile-water (50:50%, v/v), 0.1% acetic acid; cap. exit: 143V; A) and under the optimized conditions (NH<sub>4</sub>OAc buffer (50 mM, pH = 6.7) and acetonitrile (50:50%, v/v); cap. exit: 5V; B)

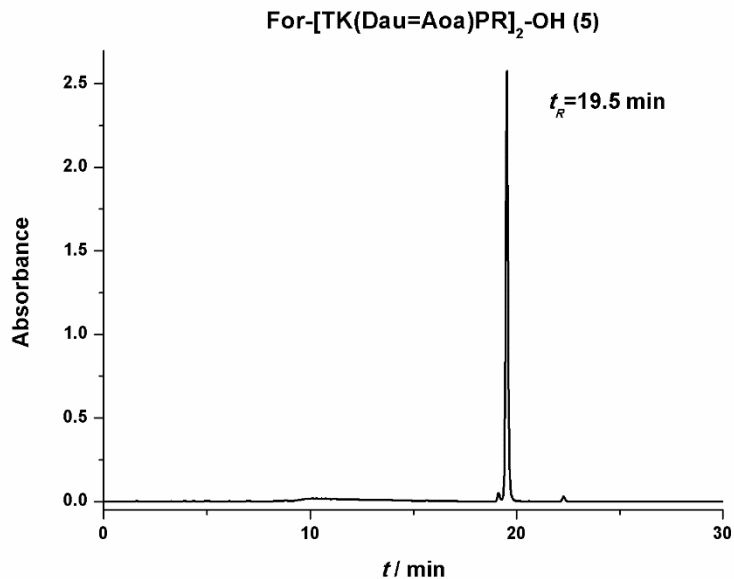

Figure S12. Analytical chromatogram of **5** (Knauer RP-HPLC; Nucleosil C18 column (5 μm, 100 Å; 250×4.6 mm) gradient: 0 min 2% B, 5 min 2% B, 30 min 90% B; eluents: 0.1% TFA in water (A) and 0.1% TFA in acetonitrile-water 80:20%, v/v (B); flow rate: 1 mL/min, detection: λ = 220 nm)



H-[TK(Dau=Aoa-GLFG)PR]<sub>2</sub>-OH (**6**)

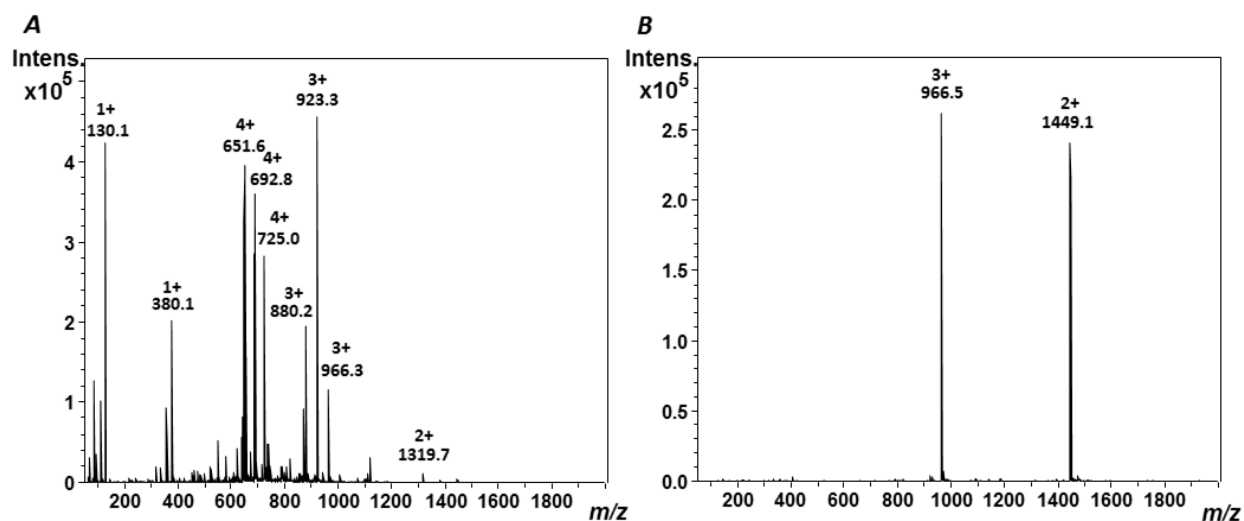

Figure S13. ESI-MS spectra of **6** under the commonly used ESI-MS conditions (acetonitrile-water (50:50%, v/v), 0.1% acetic acid; cap. exit: 143V; A) and under the optimized conditions (NH<sub>4</sub>OAc buffer (50 mM, pH = 6.7) and acetonitrile (50:50%, v/v); cap. exit: 5V; B)

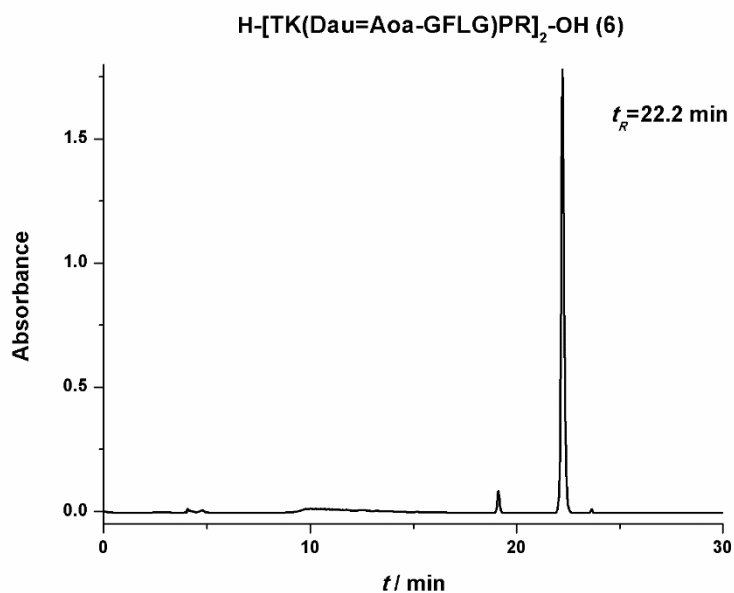

Figure S14. Analytical chromatogram of **6** (Knauer RP-HPLC; Nucleosil C18 column (5  $\mu\text{m}$ , 100  $\text{\AA}$ ; 250 $\times$ 4.6 mm) gradient: 0 min 2% B, 5 min 2% B, 30 min 90% B; eluents: 0.1% TFA in water (A) and 0.1% TFA in acetonitrile-water 80:20%, v/v (B); flow rate: 1 mL/min, detection:  $\lambda = 220 \text{ nm}$ )
